1 **Changes in wheat rhizosphere microbiota in response to chemical inputs,**  
2 **plant genotype and phenotypic plasticity**

3  
4 Samuel Jacquioud<sup>1</sup>, Tiffany Raynaud<sup>1</sup>, Eric Pimet<sup>1</sup>, Chantal Ducourtieux<sup>1</sup>, Leonardo Casieri<sup>2,3</sup>  
5 Daniel Wipf<sup>2</sup>, Manuel Blouin<sup>1\*</sup>

6  
7 <sup>1</sup>Agroécologie, AgroSup Dijon, INRAE, Univ. Bourgogne, Univ. Bourgogne Franche-Comté,  
8 F-21000 Dijon, France

9 <sup>2</sup>Agroécologie, AgroSup Dijon, CNRS, INRAE, Univ. Bourgogne, Univ. Bourgogne Franche-  
10 Comté, F-21000 Dijon, France

11 <sup>3</sup>Mycorrhizal Applications LLC, c/o BRDG Park at the Danforth Center. St. Louis, Missouri  
12 (USA)

13

14 \*Corresponding author

15

16 Correspondance:

17 Manuel Blouin

18 [manuel.blouin@agrosupdijon.fr](mailto:manuel.blouin@agrosupdijon.fr)

19

20 **Running title:** Phenotypic plasticity of plant-microbiota interactions

21

22 **ABSTRACT**

23 Since modern wheat varieties are grown with chemical inputs, we ignore if changes observed  
24 in rhizosphere microorganisms between ancient and modern varieties are due to i) breeding-  
25 induced changes in plant genotype, ii) modifications of the environment via synthetic  
26 chemical inputs, or (iii) phenotypic plasticity, defined as the interaction between the genotype  
27 and the environment. In the field, we evaluated the effects of various wheat varieties (modern  
28 and ancient) grown with or without chemical inputs (N-fertilizer, fungicide and herbicide  
29 together) in a crossed factorial design. We analysed rhizosphere bacteria and fungi by  
30 amplicons sequencing and mycorrhizal association by microscopic observations. When  
31 considered independently of plant genotype, chemical inputs were responsible for an increase  
32 in dominance for bacteria and decrease in evenness for bacteria and fungi. Independently of  
33 inputs, modern varieties had richer and more even bacterial communities compared to ancient  
34 varieties. Phenotypic plasticity had a significant effect: bacterial and fungal diversity  
35 decreased when inputs were applied in ancient varieties but not in modern ones. Mycorrhiza  
36 were more abundant in modern than ancient varieties, and less abundant when using chemical  
37 inputs. Although neglected, phenotypic plasticity is important to understand the evolution of  
38 plant-microbiota associations and a relevant target in breeding programs.

39

40 **Keywords:** ancient varieties; bacteria; fungi; genotype; inputs; landraces; microbial  
41 community; modern varieties; mycorrhiza; phenotypic plasticity; rhizosphere; wheat

42

43 **INTRODUCITON**

44

45 Rhizosphere microbiota is involved in several key functions for the plant, such as the  
46 regulation of nutrient access, environmental disturbance tolerance and disease resistance  
47 (Rodriguez et al., 2008; Mei & Flinn, 2010; Farrar et al., 2014). There is abundant evidence  
48 that host genotypes have a significant influence on rhizosphere microbial community  
49 composition (Lundberg et al., 2012; Peiffer et al., 2013) and its function, with consequences  
50 on plant growth, development and immunity (Lemanceau et al., 2017). In agriculture,  
51 understanding factors that favour crop's associations with beneficial bacteria and fungi could  
52 help in maintaining high crop yields without using synthetic chemical inputs. Breeding and  
53 application of synthetic chemical inputs are two interconnected agricultural practices, which  
54 can modify plant-microbiota interactions. Therefore, studying the effect of domestication on  
55 the rhizosphere microbiota without considering chemical inputs does not allow an accurate  
56 understanding of the evolution of plant-microbiota interactions. The effects of breeding and  
57 inputs can be described by adopting the formalism of quantitative genetics  $P = G + E + G \times E$   
58 (Falconer, 1989). In our case, the plant-microbiota interactions can be considered as a  
59 phenotypical trait "P", which can be determined by: (i) the plant genotype "G" (either modern  
60 or ancient varieties; microorganisms genotypes will not be considered explicitly here), (ii) the  
61 environment "E" (modified by agricultural practices such as the application of inputs) and (iii)  
62 the interaction between crop genotype and inputs "GxE" (defined as plant phenotypic  
63 plasticity). Indeed, previously reported observations call for considering these three important  
64 drivers of plant-microbiota interactions, which we will briefly present in the following order:  
65 E, G and GxE.

66 First, synthetic chemical inputs applied in the fields since the Green Revolution can be  
67 considered as a modification of the environment (E), with direct modifications of the soil and  
68 rhizosphere microbial communities. In a meta-analysis, long term mineral fertilizer  
69 application has been shown to increase microbial biomass by 15.1% (Geisseler and Scow,

70 2014). Fertilization can change microbial community composition, by promoting copiotroph  
71 organisms such as specific members from Actinobacteria and Firmicutes, whereas decreasing  
72 the oligotroph organisms such as specific members from Acidobacteria and Verrucomicrobia  
73 (Ramirez et al. 2012). These modifications of the soil microbial communities can reverberate  
74 on the rhizosphere community. For example, nitrogen application selects less mutualistic  
75 rhizobia, with less benefit to the host (Weese et al. 2015). In a long-term experiment, Ai et al.  
76 (2015) demonstrated that inorganic fertilization decreased the rhizospheric dependence on  
77 root derived carbon for Actinobacteria members. Similarly, plants-AMF (arbuscular  
78 mycorrhizal fungi) symbiotic association can also be altered by inorganic fertilization  
79 (Lamber et al., 2009), with changes in the diversity of AMF (Egerton & Warburton et al.,  
80 2007).

81 Second, some changes in plant-microbiota interactions can arise from modifications in the  
82 plant genome (G), through mutation, hybridization or allele fixation. Domesticated plants  
83 changed their interactions with soil microorganisms compared to their wild relatives (Garcia-  
84 Palacios et al., 2013; Milla et al., 2015; Turcotte et al., 2015). Artificial selection for  
85 improved yield in high-input agriculture could unintentionally lead to a reduction of root  
86 microbiota members involved in nutrient acquisition or plant immunity under low input  
87 conditions (Perez-Jaramillo et al., 2016). The effect of domestication (from wild relatives to  
88 cultivated crops) on rhizosphere microbiota has been observed in several crops such as barley  
89 (Bulgarelli et al., 2015), maize (Szoboszlay et al. 2015), foxtail millet (Chaluvadi and  
90 Bennetzen, 2018) and common bean (Perez-Jaramillo et al., 2017). In wheat, the rhizosphere  
91 bacterial communities of ancient varieties was more diverse than modern varieties (Germida  
92 and Siciliano, 2001). The general pattern is a rhizospheric enrichment of Actinobacteria and  
93 Proteobacteria members and a decrease in Bacteroidetes members in modern varieties  
94 compared to wild relatives (Perez-Jaramillo et al., 2018). Changes in plant-microbes

95 interactions between wild relatives, ancient varieties and modern varieties were also observed  
96 for mycorrhizal associations. Many studies showed that the mycorrhizal association and  
97 responsiveness of modern wheat varieties in terms of yield gain was lower than that of the  
98 ancient varieties or wild relatives (Kapulnik and Kushnir 1991; Hetrick et al., 1992; Zhu et al.,  
99 2001; Leiser et al., 2016). However, a meta-analysis showed that modern varieties were less  
100 intensely colonized but were more mycorrhiza-responsive compared to ancestral genotypes,  
101 concluding on the absence of evidence that agricultural and breeding practices are responsible  
102 for a lack of response to mycorrhiza in new crop genotypes (Lehmann et al., 2012).

103 Third, artificial selection may have influenced the way plant genotypes respond to inputs in  
104 terms of plant-microbiota interaction ( $G \times E$ ), i.e. the phenotypic plasticity of plant-microbiota  
105 interaction. Phenotypic plasticity denotes the ability of a genotype to exhibit changes in a  
106 specific trait across different environments (Laitinen et al., 2019). Artificial selection of  
107 modern varieties has been very efficient in providing agriculture with productive cultivars  
108 displaying stable performances across diverse environmental conditions, but it is not clear if  
109 these stable yields are linked to the phenotypic plasticity of other traits (Gage et al., 2017),  
110 such as those involved in plant-microbiota interaction. Several authors thus suggest that  
111 understanding  $G \times E$  interactions could be a novel breeding strategy, coping better with  
112 changing environments while securing stable yields. Since genes responsible for yield (i.e.  
113 mean trait value) and phenotypic plasticity (i.e. variance) are distinct, breeders should  
114 theoretically be able to select both at the same time to generate plastic varieties that adapt  
115 better to a changing environment, while maintaining a decent yield (Kusmec et al., 2017).

116 Therefore, it is necessary to evaluate the relative importance of E, G and the  $G \times E$  interaction  
117 for a more accurate understanding of the plant-microbiota interactions in the rhizosphere of  
118 selected crops. Specifically, evaluating the contribution of these parameters can help to  
119 determine if artificial selection has played an important role in the evolution of plant-

120 microbiota interactions through genetic effects, being either independent (G) or dependent  
121 (G×E) of the environment. In this aim, we studied the structure of rhizosphere microbial  
122 community of ancient and modern varieties of wheat, in the presence or absence of inputs (N-  
123 fertilizer, fungicide and herbicide). We hypothesized that i) the presence of inputs decreases  
124 the microbial diversity in the rhizosphere, ii) modern genotypes have lost their ability to  
125 establish interactions with some microbial species, iii) the lower plant-microbiota association  
126 in modern genotypes is amplified in the presence of inputs. We used an integrated approach  
127 coupling the analysis of microscopic observations of mycorrhiza, and amplicon sequencing of  
128 the bacterial (16S rRNA gene) and fungal (ITS2) communities.

129

## 130 **MATERIALS AND METHODS**

### 131 **Field site description**

132 The field experiment was conducted on dedicated plots at AgroSup Dijon, the Institut  
133 National Supérieur des Sciences Agronomiques de l'Aliment et de l'Environnement (47 °  
134 18'32 "N 5 ° 04'02" E, Dijon, France). The climate of the experimental area is semi-  
135 continental, with an average annual temperature of 11 °C (±4.5°C). Average precipitation per  
136 year is 760.5 mm, monthly sunshine hours are 1848.8 h. The clay loam soil characteristics in  
137 the 0-22 cm horizon were as follow: pH<sub>H2O</sub> = 8.0; 34.6% clay, 36.2% loam, 29.2% sand; 26.7  
138 g.kg<sup>-1</sup> organic carbon (46.2 g.kg<sup>-1</sup> organic matter), 2.11 g.kg<sup>-1</sup> total nitrogen; 294.0 g.kg<sup>-1</sup> total  
139 Ca; 0.020 g.kg<sup>-1</sup> P<sub>2</sub>O<sub>5</sub>; 24.30 cmol<sup>+</sup>.kg<sup>-1</sup>. The preceding culture was a field bean (*Vicia faba*)  
140 for all the experimental plots.

### 141 **Experimental design and sampling**

142 Two kinds of genotypes, hereafter called “breeding types” consisting of five modern and five  
143 ancient wheat varieties were sown in the 3<sup>th</sup> and 4<sup>th</sup> of November 2016. Modern varieties were

144 selected after the 60's in agrosystems concomitantly receiving high levels of inputs: Rubisko  
145 (R, 2012) provided by RAGT Semences, Descartes (D, 2014) and Sherlock (S, 2015)  
146 provided by Secobra, Alixan (A, 2005) provided by Limagrain and Tulip (T, 2011) provided  
147 by Saaten Union (<http://www.fiches.arvalis-infos.fr/>). Ancient varieties were provided by the  
148 non-governmental organization "Graines de Noé" (<http://www.graines-de-noe.org/>), which  
149 promotes the conservation of wheat landraces. Among their 200 varieties, all grown without  
150 inputs, we selected some with a local origin: Barbu du Mâconnais (BM, XIXth–beginning  
151 XXth century), Blé de la Saône (BS, before 1960), Automne Rouge (AR, XIXth century). To  
152 diversify the panel of wheat grown without synthetic inputs, we also selected Alauda (AL), a  
153 variety dedicated for organic agriculture or biodynamic, obtained in 2013 by crossing the  
154 varieties Probus (1948) and Inntaler (before 1960) and einkorn wheat (*Triticum monococcum*,  
155 EW) which is increasingly grown by farmers interested in ancient varieties  
156 (<https://urgi.versailles.inra.fr/Projects/Achieved-projects/Siregal>). Two growing conditions  
157 were tested for each variety: i) with inputs (w) and ii) without inputs (w/o), with three  
158 replicates of each condition distributed in three blocks. Inputs included fertilizer (CAN 27%  
159 Granulé, Dijon Céréales, France) for a total of 150 kg N.ha<sup>-1</sup>, applied as 50 kg N.ha<sup>-1</sup> in three  
160 times, on week 18 after sowing (09/03/2017), week 25 (24/04/2017) and week 30  
161 (30/05/2017)); herbicide (Bofix™, Dow Agro Science, supplied once at 0.3 l.ha<sup>-1</sup> on week 23,  
162 the 10/04/2017); and fungicide (Bell Star™, Dow Agro Science), applied once at 2.5 kg.ha<sup>-1</sup>  
163 on week 26, the 05/05/2017. The experiment thus consisted in 60 plots (five modern and five  
164 ancient varieties, with or without inputs, replicated three times) of 1m<sup>2</sup> each, separated from  
165 the other by 0.8m. In each plot, 300 seeds of each variety were sown manually in seven rows.

## 166 **Sampling of rhizosphere microbial communities**

167 In each plot, we sampled randomly two wheat rhizospheres. After loosening the soil with a  
168 fork, the root system of the plant with its root-adhering soil was extracted from the bulk soil.

169 In the laboratory, rhizosphere soil was gently removed from the roots by brushing. The two  
170 samples from the same plot were pooled together to obtain a representative sample. All  
171 samples were frozen at -20°C until further processing for DNA extraction.

## 172 **Microbial community analysis**

173 Total bacterial and fungal diversity and composition from rhizosphere soil samples were  
174 respectively analyzed by sequencing the 16S rRNA gene V3-V4 region, and the ITS2 region  
175 via Illumina Miseq 2x 250 bp paired-end analysis. Total DNA was extracted from 250 mg of  
176 rhizospheric soil using the DNeasy PowerSoil-htp 96 well DNA isolation kit (Qiagen,  
177 France). In two steps, 16S rRNA gene and ITS2 amplicons were generated for all extracts. In  
178 the first step, the V3-V4 hypervariable region of the bacterial 16S rRNA gene was amplified  
179 by polymerase chain reaction (PCR) using the fusion primers U341F (5'-  
180 CCTACGGGRSGCAGCAG-3') and 805R (5'-GACTACCAGGGTATCTAAT-3'), with  
181 overhang adapters (forward: TCGTCGGCAGCGTCAGATGTGTATAAGAGACAG,  
182 reverse: GTCTCGTGGGCTCGGAGATGTGTATAAGAGACAG) to allow the successive  
183 addition of multiplexing index-sequences. Fungal ITS2 was amplified using the primers  
184 ITS3F (5'- GCATCGATGAAGAACGCAGC-3') and ITS4R (5'-  
185 TCCTCCGCTTATTGATATGC-3') with overhang adapters (forward:  
186 TCGTCGGCAGCGTCAGATGTGTATAAGAGACAGNNNNGCATCGATGAAGAACGC  
187 AGC, reverse:  
188 GTCTCGTGGGCTCGGAGATGTGTATAAGAGACAGNNNNTCCTCSSCTTATTGATA  
189 TGC) to allow the successive addition of multiplexing index-sequences. First step PCR and  
190 their thermal cycling conditions were as follows: 98°C for 3 min followed by 98°C for 30 s,  
191 55°C for 30 s and 72°C for 30 s (25 and 30 cycles for 16S rRNA and ITS genes, respectively)  
192 and a final extension for 10 min at 72°C. The PCR products of the first step were used as a  
193 template for the second step of PCR. The second PCR amplification added multiplexing index



194 sequences to the overhang adapters using a unique combination of primers for each sample.  
195 Thermal cycling conditions were as follows: 98°C for 3 mn followed by 98°C for 30 s, 55°C  
196 for 30 s and 72°C for 30 s (8 and 10 cycles for 16S rRNA and ITS genes, respectively) and a  
197 final extension for 10 min at 72°C. PCR products from the second step were deposited on a  
198 2% agarose gel to validate amplification and amplicons size. Amplicon products were purified  
199 using HighPrep™ PCR Clean Up System (AC-60500, MagBio Genomics Inc., USA)  
200 paramagnetic beads using a 0.65:1 (beads:PCR product) volumetric ratio to eliminate DNA  
201 fragments below 100 bp in size and primers. Samples were normalized using SequalPrep  
202 Normalization Plate (96) Kit (Invitrogen, Maryland, MD, USA) and pooled using a 5 µl  
203 volume for each sample. The pooled sample library was concentrated using DNA Clean and  
204 Concentrator™-5 kit (Zymo Research, Irvine, CA, USA). The pooled library concentration  
205 was determined using the Quant-iT™ High-Sensitivity DNA Assay Kit (Life Technologies).  
206 The final pool concentration was adjusted to 4 nM before library denaturation and  
207 sequencing. Amplicon sequencing was performed on an Illumina MiSeq platform using  
208 Reagent Kit v2 [2 x 300 cycles] (Illumina Inc., CA, US). Demultiplexing and trimming of  
209 Illumina adapters and barcodes was done with Illumina MiSeq Reporter software (version  
210 2.5.1.3).

211

212 The 16S rRNA gene and ITS amplicon sequences were analyzed internally using a Python  
213 notebook (available upon request). Briefly, using PEAR with default settings, forward and  
214 reverse sequences were assembled. Additional quality checks were conducted using the  
215 QIIME pipeline and short sequences were removed (< 400 bp for 16S and < 300 bp for ITS).  
216 Reference based and *de novo* chimera detection, as well as clustering into operational  
217 taxonomic units (OTUs, hereafter called taxa) were executed using VSEARCH and the  
218 adequate reference databases (Greengenes' representative set of sequences for 16S rRNA

219 gene and UNITE's ITS2 reference dynamic dataset for ITS). We deliberately choose the OTU  
220 analysis over the Amplicon Sequence Variant analysis (ASVs) for consistency reasons, since  
221 the latter pipeline is currently not available for fungal ITS sequences. The identity thresholds  
222 were appropriately set at 94 % for 16S and 97 % for ITS based on our routine internal  
223 calibration controls (mock communities) in order to get the most accurate resolution. For  
224 simplicity reasons, we refer only to 16S rRNA gene amplicon sequences as "bacterial", since  
225 archaeal sequences were extremely rare. Taxonomy was allocated using UCLUST and the  
226 latest released Greengenes database (v.05/2013). For ITS, the taxonomy assignment was  
227 executed using BLAST algorithm and the UNITE reference database (v.7-08/2016). A  
228 summary table is provided in supporting information to present the sequenced samples and  
229 the number of sequences recovered (Table S1). Sequences have been submitted to the  
230 Sequence read Archive public repository (SRA, <https://www.ncbi.nlm.nih.gov/sra>), under the  
231 following accession numbers for the 16S rRNA gene amplicon dataset: SUB9063594; and for  
232 the ITS2 amplicon dataset: SUB9104701

233

### 234 **Alpha-diversity analysis of microbial communities**

235 To explore the sequencing completeness in terms of diversity recovery per sample, individual  
236 raw rarefaction curves were calculated using the "*vegan*" package in R (Fig. S1). After careful  
237 evaluation of the rarefaction curves, we identified a series of problematic samples coming  
238 from the same column in the 96-well plate, harboring significantly higher sequences counts  
239 but relatively lower OTU discovery rates than the others ( $p < 0.001$ ). In order to avoid biasing  
240 our conclusions, we decided not to consider those samples for further analyses. Due to the  
241 unevenness of sequencing depth and its consequences on diversity assessment, we applied  
242 random re-sampling for normalization of samples in each data set. The samples were rarefied  
243 at 14,000 for both bacteria and fungi. Those levels are considered to be appropriated for

244 accurate alpha-diversity estimations based on best practices guidelines (Schöler et al., 2017).  
245 Alpha-diversity analysis was performed using the following indices: observed taxa richness (S),  
246 estimated richness (Chao-1), ACE (Abundance-based Coverage Estimator), Simpson index  
247 ( $1-D$ ,  $D$  = Dominance), Shannon index (H) and Equitability ( $J = H/\ln(S)$ ). Alpha-diversity  
248 indices were exported for bacteria and fungi. An additional PERMANOVA on the six  
249 diversity indices taken together was also performed to detect the overall effect of factors on  
250 bacterial and fungal diversity.

251

### 252 **Beta-diversity analysis of microbial communities**

253 For the beta diversity analysis, we used the rarefied dataset. In order to consistently analyze  
254 both bacterial and fungal profiles with the same method, we choose the Bray-Curtis  
255 dissimilarity index to generate the distance matrices (package ‘*vegan*’, Dixon, 2003). The  
256 Bray-Curtis dissimilarity index was preferred over other metrics (e.g. UniFrac) as ITS  
257 sequences cannot be aligned to obtain a phylogenetic distance. We first assessed with  
258 PERMANOVA the significance of each factor on the structure of bacterial and fungal  
259 community. As only the breeding type and the block had a significant effect, a partial  
260 distance-based redundancy analysis (db-RDA) was used with the following model: breeding  
261 type + Condition (block) (‘*capscale*’ function, package ‘*vegan*’, 10,000 permutations).

262

### 263 **Network analysis**

264 We investigated the structure of the modern and ancient wheat varieties rhizosphere  
265 microbiota using a network approach based on edge arithmetic (Jacquiod et al. 2020) to focus  
266 on OTU correlations that are specific of each type of breeding. We first calculated two  
267 separated partial correlation matrices amongst dominant rhizosphere OTUs (total summed  
268 counts = 100 minimum, occurrence = 25/51 samples), one for the modern and one for the

269 ancient varieties using Poisson Log Normal models (PLN, package ‘*PLNmodels*’, Chiquet et  
270 al. 2019). This method allows the combining of several datasets, thus enabling the integration  
271 of both bacterial and fungal sequencing data together using the ‘TSS’ offset criteria (Total  
272 Sum Scaling). The following model was built to account for the block effect for both modern  
273 and ancient varieties “ $\sim 1 + \text{block} + \text{offset}$ ”. The PLN models were validated by using the  
274 Bayesian Information Criterion (BIC) to determine the most appropriated sparsifying penalty  
275 levels (BIC,  $R^2$  ancient = 0.98 ;  $R^2$  modern = 0.97). We then applied edge arithmetic with the  
276 ‘*igraph*’ package functions (Csardi and Nepusz, 2006). Briefly, we intersected both modern  
277 and ancient networks to systematically determine whether correlations were common to both  
278 breeding types or specific of one breeding type. For visualization, the two networks were then  
279 merged and opened in the ‘*Cytoscape*’ software (Shannon et al. 2003). The complexity of  
280 networks was investigated by means of the degree index, the node betweenness and the edge  
281 betweenness.

282

### 283 **Mycorrhizal colonization**

284 Two root systems per plot were collected and pooled together 29 weeks after sowing, from  
285 the 22<sup>th</sup> to the 24<sup>th</sup> of May 2017. Root material was washed thoroughly and prepared for  
286 staining as described in Vierheilig et al. (1998). Roots were cleared at 90°C for 5 to 10 min in  
287 10% KOH, placed in black ink (5% in acetic acid) for 5 min at 90°C for coloration, rinsed  
288 with water and put for 25 min in 8% acetic acid at room temperature. Roots were rinsed again  
289 with water, covered with pure glycerol and stored at 4°C. For microscopic observation, roots  
290 were cut into 1 cm fragments and 15 fragments were placed in glycerol between slide and slip  
291 cover four times per sample. There were two batches of microscope slides for convenience of  
292 counting, called “Series” in the statistical analysis. Mycorrhization rates were assessed  
293 according to Trouvelot et al. (1986) and expressed as mycorrhizal colonization i.e. frequency

294 of root fragments with mycorrhizal structures at the root system scale (F), intensity of the  
295 mycorrhizal colonization at the root system scale (M) or restricted to mycorrhizal root  
296 fragments (m), arbuscule abundance at the root system scale (A) or restricted to mycorrhizal  
297 root fragments (a).

298

### 299 *Univariate statistical analysis*

300 The statistical analysis of univariate data, including alpha-diversity indices and mycorrhiza  
301 traits, was performed in Rstudio software (RStudio Team, 2020). Normality and  
302 homoscedasticity of the data was assessed using Shapiro and Bartlett test respectively using R  
303 default functions. Normally distributed data were analyzed with construction of an ANOVA  
304 model, significance was assessed using the D'Agostino test of skewedness on the residual  
305 variance (package '*moments*', Komsta and Novomestky, 2015), followed by a post-hoc  
306 Tukey'Honest Significant Detection test (Tukey's HSD,  $p < 0.05$ , package '*agricolae*', De  
307 Mendiburu, 2017). Non-parametric data were analyzed with a Kruskal-Wallis test followed by  
308 a post-hoc False Discovery Rate test correction to account for multiple testing (FDR,  $p < 0.05$ ,  
309 package '*agricolae*'). We present the percentage of variance explained and associated  $p$ -  
310 values from the ANOVA models if variables are normally distributed, and only the  $p$ -value  
311 from the Kruskal-Wallis test if not normally distributed.

312

## 313 **RESULTS**

### 314 **Effects of breeding types and inputs on bacterial community**

315 Breeding type (ancient vs modern varieties) had a significant effect on all bacterial alpha  
316 diversity indices, including the richness (explaining 15.56% of the total variance,  $p < 0.001$ ),  
317 Chao-1 (6.9%,  $p = 0.025$ ), ACE (5.9%,  $p = 0.044$ ), Simpson reciprocal ( $p = 0.044$ ), Shannon  
318 ( $p = 0.002$ ) and Equitability ( $p = 0.012$ ) (Tables 1, Table S2). The presence/absence of inputs

319 had a barely significant effect on community evenness, including the Simpson reciprocal ( $p =$   
320 0.048) and Equitability ( $p = 0.057$ ) (Tables 1 and S2). The interaction between breeding type  
321 and inputs had a significant effect on richness (7.7%,  $p = 0.011$ ), ACE (6.8%,  $p = 0.031$ ),  
322 Simpson reciprocal ( $p = 0.013$ ), Shannon ( $p = 0.001$ ) and Equitability ( $p = 0.006$ ). The  
323 different varieties inside each breeding type was the main source of variation for richness  
324 (46.1%,  $p = 0.009$ ), Chao1 (49.9%,  $p = 0.015$ ) and ACE (47.5%,  $p = 0.028$ ) indices. When the  
325 six diversity indices were analyzed simultaneously in a PERMANOVA (Table 2), we found  
326 an overall significant effect of the breeding type (7.4%,  $p = 0.013$ ) and its interaction with  
327 chemical inputs (5.7,  $p = 0.034$ ). The variety error term inside breeding type was also  
328 significant (48.8%,  $p = 0.015$ ). The overall multivariate model explained 63.5% of the  
329 variance.

330 Regarding the direction of the effects of factors on bacterial diversity, we found that,  
331 considering both treatments with and without inputs together, modern varieties had richer and  
332 more even communities as compared to ancient varieties (Fig. 1). Considering both ancient  
333 and modern varieties together, the presence of inputs had significant effects only on evenness  
334 indices, with a slight increase in dominance of some taxa. However, the addition of inputs  
335 was responsible for a strong and significant decrease in diversity for ancient varieties for  
336 richness, Simpson reciprocal, Shannon and Equitability, but it had no effect on modern  
337 varieties (Fig. 1).

338 The PERMANOVA on bacterial community beta diversity (Table 3) showed that the breeding  
339 type (2.7%,  $p = 0.036$ ) and the block (6.5%,  $p < 0.001$ ) but not the inputs had a significant  
340 effect (1.8%,  $p = 0.701$ ). From this result, we profiled the structural changes in bacterial  
341 communities using a distance-based partial redundancy analysis on Bray-Curtis dissimilarities  
342 for breeding type only (the block effect was added as an error term). The total variance  
343 explained was 2.3% ( $p = 0.016$ ) and the first constrained component (CAP1) and first non-

344 constrained component (MDS1) were explaining 2.5 and 4.2% of variance, respectively (Fig.  
345 2A). Ordination plots indicated that bacterial community structure differed between breeding  
346 types.

### 347 **Effects of breeding types and inputs on fungal community**

348 Breeding type had no significant effect on fungal diversity (Table 4, Table S3). The  
349 presence/absence of inputs showed a significant effect on the Shannon diversity (6.7%,  $p =$   
350 0.044). The interaction between breeding type and inputs had a significant effect on the Chao-  
351 1 estimation (13.9%,  $p = 0.025$ ). The effect of the different varieties inside each breeding type  
352 had no significant effect, despite a relatively high percentage of variance (Table S3). When  
353 the six diversity indices were analyzed simultaneously in a PERMANOVA (Table 2), we  
354 found no significant effects of inputs (0.4%,  $p = 0.765$ ), breeding type (0.02%,  $p = 0.995$ ),  
355 variety (11.8%,  $p = 1.000$ ) and block (4.6%,  $p = 0.444$ ) alone, but the breeding x inputs  
356 interaction was responsible for an overall effect on fungal diversity indices, with 10.5% of  
357 explained variance ( $p = 0.053$ ). The overall multivariate model explained 27.3% of the  
358 variance.

359 Regarding the direction of effects, we found no effect of the breeding type or of the presence  
360 of inputs alone (Fig. 3). Ancient varieties in the absence of inputs had the highest observed  
361 fungal diversity (not significant after post-hoc correction for multiple comparison, likely due  
362 to the interference of the block effect). For most of the diversity indices, the addition of inputs  
363 induced a decrease in fungal diversity for ancient varieties and, conversely, an increase in  
364 diversity in modern varieties (Fig. 3). The significant interaction was illustrated by the  
365 crossing of all reaction norms, which was only supported statistically for the Chao-1 index.

366 The PERMANOVA on fungal community beta diversity showed that the breeding type  
367 (2.5%,  $p = 0.052$ ), the block (5.4%,  $p = 0.011$ ) and variety (34.7%,  $p = 0.020$ ) had significant

368 effects, but not the inputs (2.2%,  $p = 0.14$ ). Based on this result, we profiled the structural  
369 changes in fungal communities using a distance-based partial redundancy analysis based on  
370 Bray-Curtis dissimilarities for breeding types alone (the block effect was added as an error  
371 term). The total variance explained was 3.0% ( $p = 0.057$ ), and the first constrained  
372 component (CAP1) and first non-constrained component (MDS1) were explaining 2.76 and  
373 13.50% of variance, respectively (Fig. 2B). As for bacterial community structure, ordination  
374 plots showed a differentiation trend in the fungal community structure between modern and  
375 ancient varieties while inputs addition had no effect.

### 376 **Network analysis**

377 The PLN models successfully converged into stable networks for the modern varieties (BIC  
378  $R^2 = 0.97$ ) and ancient varieties (BIC  $R^2 = 0.98$ ). The modern network featured 178 OTUs  
379 (nodes) and 452 edges (correlations) of which 245 were positive and 207 negative. The  
380 ancient network featured 185 OTUs (nodes) and 402 edges (correlations) of which 238 were  
381 positive and 164 negative. The comparison between the two networks revealed a similar level  
382 of node degree (Fig. 4A), but a significantly higher level of centrality in the ancient network  
383 based on average betweenness (either on nodes:  $p = 0.05$ ; and on edges  $p = 4.93 \cdot 10^{-14}$ ; Fig.  
384 4BC). The positive-to-negative edge ratio was in favour of more positive correlations in the  
385 ancient network (1.40 vs 1.14). When combining both networks and highlighting the position  
386 of common and unique edges found either in modern or ancient varieties, a clear distinction  
387 was found, with a clearly different interaction structure depending on the breeding type (Fig.  
388 4A). In total, this combined network featured 252 unique OTUs, amongst which 108 were  
389 common to both breeding type, while 76 were unique of the ancient varieties and 68 of the  
390 modern varieties. Most OTUs were affiliated to Ascomycota (55%), which clearly dominated  
391 both networks.

### 392 **Mycorrhizal colonization response to breeding types and inputs**



393 The frequency of mycorrhization,  $F$ , (number of mycorrhizal root fragments divided by the  
394 total number of observed fragments) was affected neither by the breeding type, the inputs nor  
395 their interaction (Table 5 and S4). Breeding types had an impact on the intensity of  
396 mycorrhizal colonization in root system M (explaining 4.3% of total variance,  $p = 0.005$ ), in  
397 mycorrhizal root fragments  $m$  (4.5%,  $p = 0.009$ ), as well as on arbuscule abundance in root  
398 system A ( $p = 0.018$ ) and in mycorrhizal root fragments  $a$  (5.6%,  $p = 0.002$ ). Inputs had an  
399 impact only on the intensity of mycorrhizal colonization in root system M (explaining 2.6% of  
400 the total variance,  $p = 0.027$ ) and in mycorrhizal root fragments  $m$  (2.6%,  $p = 0.046$ ). The  
401 interaction between breeding type and inputs was only significant on arbuscular abundance in  
402 root system A ( $p = 0.032$ , Table 5). When performing a PERMANOVA on all mycorrhiza  
403 indices, a significant breeding effect was detected, in favor of higher index values for the  
404 modern varieties (2.8%,  $p = 0.008$ , Table 2). The overall multivariate model explained % of  
405 the variance. Regarding the direction of effects, mycorrhiza colonization was higher in  
406 modern varieties compared to ancient ones (Fig. 5ABCD) and the application of inputs  
407 decreased the intensity of mycorrhizal colonization in the root system and root fragment (Fig.  
408 5EF).

409

## 410 **DISCUSSION**

411 Modern varieties of wheat were selected and generally grown with synthetic chemical inputs  
412 whereas ancient varieties were selected and grown without this kind of inputs, in organic  
413 farming systems. This correlation between variation in genotype and environment prevent to  
414 assess the relative importance of individual factors (E and G) and their interaction (G×E) in  
415 plant-microbiota relationships. In addition, comparison between modern and ancient varieties  
416 are generally made in controlled conditions in the absence of inputs or in nutrient depleted  
417 soils, which prevents any realistic conclusion on the evolution of plant-microbiota

418 relationships in the field, since modern varieties are grown with inputs. Our results are a first  
419 attempt to quantify these environmental and genotypic effects independently, in the field.

#### 420 **Effects of inputs on plant-microbiota interactions**

421 The presence/absence of inputs – here considered as our environmental conditions “E” – had  
422 a low impact on plant-microbiota relationships. When considered independently of the  
423 breeding type, inputs had only a slight significant effect on microbial alpha-diversity, via a  
424 lowering of specific evenness indices when applied, thus indicating an increased dominance  
425 of some microbial OTUs (Fig. 1 & 3; Tables 2 & 4; Tables S2 & S4). The intensity of  
426 mycorrhizal colonization was higher in the absence than in the presence of inputs (M and m,  
427 Table 5 and Fig. 5). However, this had no consequence on the intensity of arbuscule  
428 development (A and a, Table 5 and Fig. 5), and thus likely no functional impact. The  
429 presence/absence of inputs also had no effect on the overall composition of fungal and  
430 bacterial communities in the rhizosphere (Fig. 2). Taken together, these results support our  
431 first hypothesis that the presence of inputs decreases the microbial diversity in the  
432 rhizosphere. This decrease in diversity in the presence of inputs was expected for several  
433 reasons. First, the addition of N fertilizer can induce a shift in bacterial communities. In line  
434 with our results, Grunert et al. (2019) reported that the addition of an inorganic fertilizer  
435 (struvite) reduced the diversity (Pielou equitability, Shannon and Simpson reciprocal) of  
436 tomato rhizosphere microbiota. In a study with two sites where N was added for 27 and 8  
437 years, the authors found that bacterial community structure was highly responsive to N  
438 additions, but the diversity of bacterial community did not have a consistent response  
439 (Ramirez et al., 2010). As a matter of fact, the shift in bacterial community composition is  
440 mainly observed in soils with low C and N concentrations (Ramirez et al., 2012). The C and  
441 N concentrations in our soil presented a medium value, which could explain the weak effect  
442 of nitrogen fertilization effect. Second, the effect of fungicide could have suppressed some

443 fungal taxa. It has been shown that commonly used fungicides with foliar application had  
444 moderate but significant effect on the composition of fungal communities in the wheat  
445 phyllosphere (Karlsson et al., 2014). While fungicides are supposed to target specific fungal  
446 pathogens, the impact on fungal communities has been already observed (Esmaeili Taheri et  
447 al., 2015). Third, the effect of herbicide could have modified the weed community, which in  
448 turn could have influenced microbial community, although this mechanism has not been  
449 studied yet, to our knowledge. Our weak observations can also be explained by the fact that  
450 inputs are often reported to affect *bulk soil* microbial communities, whereas *rhizosphere*  
451 microbial communities are more dependent on plant factors than on soil properties (Grunert et  
452 al., 2019).

#### 453 **Effects of breeding on plant-microbiota interactions**

454 The breeding type – here considered as the genotype G – had a strong effect on rhizosphere  
455 microbial communities, which was dependent on the microbial taxa (bacteria or fungi),  
456 meaning that plant-microbiota relationships were differently influenced by breeding from  
457 ancient to modern varieties. When considering the impact of the genotype independently of  
458 the use of inputs, we found that breeding type affected bacterial diversity, with a percentage  
459 of explained variance from 5.9 to 15.6% of the variance according to the index (Table S2) and  
460 7.4% of the variance when all indices were analyzed together (Table 2). The variety inside  
461 each breeding type was the strongest determinant of bacterial diversity, explaining 46.1 to  
462 49.9% of the total variance, and 48.8% when all indices were analyzed together, stressing the  
463 importance of genotype. Conversely, the breeding type had no effect on fungal diversity  
464 (Table S3). However, all mycorrhiza indices (except F) were higher with modern varieties  
465 compared to ancient ones (Table 5, Table 2, Fig. 5). The breeding type also affected slightly  
466 the overall composition of fungal and bacterial communities (Table 3, Fig. 2), but its strongest  
467 effect was noticed on the structure of the rhizosphere microbiota network (Fig. 4). Indeed, the

468 different breeding types featured completely distinct co-occurrence links amongst the  
469 dominant microbial OTUs, which resulted in a significantly less complex network for the  
470 modern varieties compared to the ancient ones. Therefore, our results partially invalidated the  
471 second hypothesis that modern genotypes have lost their ability to establish interactions with  
472 microbial species, as we evidenced that this interaction still exists and may even be reinforced  
473 in the case of mycorrhiza. However, the interaction with bacteria and other fungal members  
474 has been completely restructured into a simplified form.

475 Although this hypothesis is supported by several studies in the literature, there is no  
476 consensus. Among supporting results, Valente et al. (2020) found that ancient wheat varieties  
477 were more capable of interacting with beneficial plant growth rhizobacteria than modern  
478 varieties. Moreover, a decrease in the diversity of symbiotic rhizobia associations has been  
479 observed in domesticated legumes compared to wild relatives (Kim et al. 2014; Sangabriel-  
480 Conde et al. 2015). Mutch and Young (2004) reported that the ability to interact with  
481 symbionts was limited for modern pea and broad bean as compared to wild relatives of the  
482 *Vicia* and *Lathyrus* genera in a non-agricultural soil without inputs. Other studies found more  
483 nuanced results: Leff et al. (2016) reported that neither root nor rhizosphere bacterial  
484 communities were affected by sunflower domestication, but domestication did affect the  
485 composition of rhizosphere fungal communities. Brisson et al. (2019) reported similar  
486 Shannon index for prokaryotic or fungal communities in teosinte, inbred and modern  
487 varieties; they observed that co-occurrence network of microbiota of inbred maize lines'  
488 rhizosphere were significantly closer from those of the teosintes than to the modern hybrids.  
489 Opposed results also exist: Kinnunen-Grubb et al. (2020) reported that bacterial colonization  
490 in the roots of modern cultivars of wheat is faster than in ancestors. This could be explained  
491 by the fact that modern varieties could have lost their ability to specifically select for  
492 beneficial microbial partners compared to ancient varieties (Kiers and Denison, 2008).

493 Indeed, with six soybean cultivars representing 60 years of breeding, Kiers et al. (2007)  
494 showed that ancient varieties were more performant than modern varieties in maintaining a  
495 high fitness (seed production) when infected with a mixture of effective and ineffective  
496 rhizobia strains. This lower selectivity of modern varieties could explain the associated higher  
497 diversity in rhizosphere microbiota that we observed in the presence of inputs. However, a  
498 meta-analysis on the effects of breeding on mycorrhizal responsiveness found that varieties  
499 released after 1950 were more mycorrhizal-responsive (in terms of increased biomass  
500 production) than old varieties (1900-1950) and ancestors (before 1900) (Lehmann et al.,  
501 2012). So the fact that modern varieties establish either adaptive or non-adaptive interactions  
502 with soil microbiota remains an open question (see Ghalambor et al., 2007 for in-depth  
503 discussion). The aim of our experiment was not to evaluate the fitness gain due to plant-  
504 microbiota interactions, but it would be an interesting perspective.

505

### 506 **Effects of phenotypic plasticity on plant-microbiota interactions**

507 We speculate that these contradictory results regarding the effect of breeding could be due to  
508 the interaction between plant genotype and the environment. Our experimental design allowed  
509 to assess whether variations in plant-microbiota interaction are affected by the interaction  
510 between the breeding type and the presence of inputs, called phenotypic plasticity. Namely,  
511 phenotypic plasticity describe the capability of a genotype to produce different phenotypes in  
512 response to variation in environmental conditions (Gause, 1947; Bradshaw, 1965). It is an  
513 ubiquitous aspect of organisms. The profile of phenotypes produced by a genotype across  
514 environments is the "norm of reaction" (Schmalhausen, 1949; Stearns, 1989).

515

516 Indeed, phenotypic plasticity – here considered as the G×E interaction – had an important  
517 impact on plant-microbiota relationships. It affected several indices of bacterial and fungal

518 diversity (Tables 1 and 3, Tables S2 and S3, Figs. 1 and 3). For the bacterial community, this  
519 effect of phenotypic plasticity (5.7%) was in the same range as the effect of the breeding type  
520 (7.4%, Table 2). For the fungal community, the effect of the breeding type was not  
521 significant, whereas the effect of phenotypic plasticity was significant and relatively  
522 important when considering all indices together (10.5%, Table 2). However, phenotypic  
523 plasticity had no impact on the intensity of mycorrhizal colonization (Table 5) or on the  
524 overall structure of bacterial and fungal communities (Table 3). This G×E interaction was key  
525 in understanding the variations of diversity: ancient varieties had a decreased bacterial and  
526 fungal diversity in the presence compared to the absence of inputs, whereas modern varieties  
527 kept diverse rhizosphere microbial community in the presence of inputs. This contradicts our  
528 third hypothesis that the lower plant-microbiota association with modern genotypes is  
529 amplified in the presence of inputs. The literature reports many cases of interaction between  
530 genotype and environment for other plant traits and considering plasticity as a trait among  
531 others allows finding out some genetic determinant of plasticity. For example, grain yield  
532 variation in maize was found to result from the environment (a large geographic and climatic  
533 transect of North American) for 43%, genotype for 7% and G×E for 6% (see Gage et al. 2017,  
534 Supp. Fig. 4). The authors found that genomic regions that have experienced changes in allele  
535 frequency due to selection for productivity in temperate conditions explain less G×E variation  
536 than regions in which allele frequency was unaffected by selection. Loci associated with G×E  
537 interaction were mainly located in the regulatory regions of the genome (Gage et al., 2017).  
538 Regarding plant-microbiota interactions, it has been observed in *Boechera stricta*  
539 (Brassicaceae), a perennial wild mustard grown in various sites in North America, that the  
540 G×E effect on microbial community was stronger for the phyllosphere than the rhizosphere,  
541 with an impact on the Shannon index greater than the impact of the genotype itself (but the  
542 opposite was true for Chao1) (Wagner et al., 2016). We found one experiment considering

543 both wild relatives and cultivated varieties and the manipulation of inputs as an environmental  
544 variation (Shi et al. 2019). Using one single ancient and modern varieties of soybean and rice,  
545 they reported that the rhizosphere microbiota of wild relatives are more affected by a  
546 fungicide than the cultivated ones and that the G×E interaction had a significant effect on  
547 fungal community. However, they did not discuss their results in terms of phenotypic  
548 plasticity.

549

550

## 551 **CONCLUSION**

552

553 The evolution of the phenotypic plasticity of plant-microbiota interactions has been neglected  
554 up to now by microbial ecologists and geneticists. This knowledge gap makes difficult any  
555 robust conclusion on the fact that modern varieties have lost or improved their ability to  
556 interact with soil microbiota. Our results suggest that modern varieties are less sensitive to the  
557 negative effect of inputs on plant-microbiota interactions than ancient varieties. This could be  
558 explained by a loss of ability to regulate plant-microbiota interactions according to soil  
559 fertility in modern varieties, in accordance the results of Gage et al. (2017) showing that G×E  
560 variation is disproportionately controlled by regulatory mechanisms as compared with other  
561 traits. This is coherent with the fact that modern varieties were not exposed to huge variations  
562 of soil fertility such as ancient ones, as they have been selected and grown in the presence of  
563 inputs. So there were less selective constraints on the modern regarding the ability to fit with  
564 the heterogeneity of soil fertility. However, environmental pollution by synthetic chemical  
565 inputs will likely lead to grow crops with less inputs, so in environments with more  
566 heterogeneous levels of fertility. Integrating phenotypic plasticity in plant-microbiota  
567 interactions as a target in future breeding programs could be very useful to obtain varieties

568 with high yield, but able to finely adapt their interactions with microbiota to variations in soil  
569 fertility.

570

## 571 **ACKNOWLEDGEMENTS**

572 We thank AgroSup Dijon for experimental facilities. We are grateful to Jean-Philippe  
573 Guillemin, Wilfried Queyrel and Etienne Gaujour for their advices in wheat culture and the  
574 management of the experimental site. We thank Tariq Shah for his contribution to the  
575 bibliographical search. We also thank Graines de Noé, especially Hélène Montaz, for  
576 providing the seeds of ancient varieties, as well as RAGT Semences, Secobra, Saaten Union  
577 and Limagrain for providing the modern varieties.

578

## 579 **AUTHOR CONTRIBUTIONS**

580 MB conceived the research, MB wrote the paper, CD, EP and MB carried out the experiment,  
581 SJ dealt with sample preparation for sequencing and bioinformatics analysis, SJ did the  
582 statistical analyses and edited the figures and tables, DW, LC and TR did the mycorrhiza  
583 observations, SJ, TR, LC and DW edited and commented the paper.

584

## 585 **FUNDING**

586 Samuel Jacquiod was funded by the University of Bourgogne Franche-Comté via the ISITE-  
587 BFC International Junior Fellowship award (AAP3:RA19028.AEC.IS).

588

## 589 **CONFLICT OF INTEREST**



590 The authors declare no conflict of interest.

591

592 **REFERENCES**

- 593 Ai, C., Liang, G., Sun, J., Wang, X., He, P., Zhou, W., & He, X. (2015). Reduced dependence  
594 of rhizosphere microbiome on plant-derived carbon in 32-year long-term inorganic and  
595 organic fertilized soils. *Soil Biology and Biochemistry*, 80, 70-78.
- 596 Bradshaw, A. D. (1965). Evolutionary significance of phenotypic plasticity in plants.  
597 *Advances in Genetics*, 13, 115–155.
- 598 Brisson, V. L., Schmidt, J. E., Northen, T. R., Vogel, J. P., & Gaudin, A. C. (2019). Impacts  
599 of maize domestication and breeding on rhizosphere microbial community recruitment from a  
600 nutrient depleted agricultural soil. *Scientific reports*, 9(1), 1-14.
- 601 Bulgarelli, D., Garrido-Oter, R., Münch, P. C., Weiman, A., Dröge, J., Pan, Y., ... & Schulze-  
602 Lefert, P. (2015). Structure and function of the bacterial root microbiota in wild and  
603 domesticated barley. *Cell host & microbe*, 17(3), 392-403.
- 604 Chaluvadi, S., & Bennetzen, J. L. (2018). Species-associated differences in the below-ground  
605 microbiomes of wild and domesticated *Setaria*. *Frontiers in plant science*, 9, 1183.
- 606 Chiquet, J., Robin, S., & Mariadassou, M. (2019). Variational inference for sparse network  
607 reconstruction from count data. In *International Conference on Machine Learning* (pp. 1162-  
608 1171). PMLR.
- 609 Csardi, G., & Nepusz, T. (2006). The igraph software package for complex network research.  
610 *InterJournal, complex systems*, 1695(5), 1-9.
- 611 De Mendiburu, F. (2017). Package ‘Agricolae’: Statistical Procedures for Agricultural  
612 Research, R Package Version 1.2–4.
- 613 Dixon, P. (2003). VEGAN, a package of R functions for community ecology. *Journal of*  
614 *Vegetation Science*, 14(6), 927-930.

- 615 Egerton-Warburton, L. M., Johnson, N. C., & Allen, E. B. (2007). Mycorrhizal community  
616 dynamics following nitrogen fertilization: a cross-site test in five grasslands. *Ecological*  
617 *monographs*, 77(4), 527-544.
- 618 Esmaili Taheri, A., Hamel, C., & Gan, Y. (2015). Pyrosequencing reveals the impact of  
619 foliar fungicide application to chickpea on root fungal communities of durum wheat in  
620 subsequent year. *Fungal Ecology*, 15, 73–81. <https://doi.org/10.1016/j.funeco.2015.03.005>
- 621 Falconer, D.S., 1989. Introduction to quantitative genetics. Longman, London.
- 622 Farrar, K., Bryant, D., & Cope-Selby, N. (2014). Understanding and engineering beneficial  
623 plant–microbe interactions: plant growth promotion in energy crops. *Plant biotechnology*  
624 *journal*, 12(9), 1193-1206.
- 625 Gage, J. L., Jarquin, D., Romay, C., Lorenz, A., Buckler, E. S., Kaeppler, S., ... de Leon, N.  
626 (2017). The effect of artificial selection on phenotypic plasticity in maize. *Nature*  
627 *Communications*, 8, 1348.
- 628 García-Palacios, P., Maestre, F. T., Kattge, J., & Wall, D. H. (2013). Climate and litter  
629 quality differently modulate the effects of soil fauna on litter decomposition across biomes.  
630 *Ecology letters*, 16(8), 1045-1053.
- 631 Gause, G. F. (1947). Problems of evolution. *Trans. Conn. Acad. Sci.*, 37, 17–68.
- 632 Geisseler, D., & Scow, K. M. (2014). Long-term effects of mineral fertilizers on soil  
633 microorganisms - A review. *Soil Biology and Biochemistry*, 75, 54–63.  
634 <https://doi.org/10.1016/j.soilbio.2014.03.023>
- 635 Germida, J., & Siciliano, S. (2001). Taxonomic diversity of bacteria associated with the roots  
636 of modern, recent and ancient wheat cultivars. *Biology and Fertility of Soils*, 33(5), 410-415.

- 637 Ghalambor, C.K., McKay, J.K., Carroll, S.P., Reznick, D.N., 2007. Adaptive versus non-  
638 adaptive phenotypic plasticity and the potential for contemporary adaptation in new  
639 environments. *Functional Ecology* 21, 394–407. [https://doi.org/10.1111/j.1365-](https://doi.org/10.1111/j.1365-2435.2007.01283.x)  
640 [2435.2007.01283.x](https://doi.org/10.1111/j.1365-2435.2007.01283.x)
- 641 Grunert, O., Robles-Aguilar, A. A., Hernandez-Sanabria, E., Schrey, S. D., Reheul, D., Van  
642 Labeke, M. C., ... & Temperton, V. M. (2019). Tomato plants rather than fertilizers drive  
643 microbial community structure in horticultural growing media. *Scientific reports*, 9(1), 1-15.
- 644 Hetrick, BAD, Wilson, GWT, & Cox, TS (1992). Mycorrhizal dependence of modern wheat  
645 varieties, landraces, and ancestors. *Canadian Journal of Botany*, 70 (10), 2032-2040.
- 646 Jacquiod, S., Puga-Freitas, R., Spor, A., Mounier, A., Monard, C., Mougél, C., ... & Blouin,  
647 M. (2020). A core microbiota of the plant-earthworm interaction conserved across soils. *Soil*  
648 *Biology and Biochemistry*, 144, 107754.
- 649 Kapulnik, Y., & Kushnir, U. (1991). Growth dependency of wild, primitive and modern  
650 cultivated wheat lines on vesicular-arbuscular mycorrhiza fungi. *Euphytica*, 56(1), 27-36.
- 651 Karlsson, I., Friberg, H., Steinberg, C., & Persson, P. (2014). Fungicide effects on fungal  
652 community composition in the wheat phyllosphere. *PLoS ONE*, 9(11), e111786.  
653 <https://doi.org/10.1371/journal.pone.0111786>
- 654 Kiers, E. T., & Denison, R. F. (2008). Sanctions, cooperation, and the stability of plant-  
655 rhizosphere mutualisms. *Annual Review of Ecology, Evolution, and Systematics*, 39, 215-  
656 236.
- 657 Kiers, E. T., Hutton, M. G., & Denison, R. F. (2007). Human selection and the relaxation of  
658 legume defences against ineffective rhizobia. *Proceedings of the Royal Society B: Biological*  
659 *Sciences*, 274(1629), 3119-3126.

- 660 Kim, B. H., Ramanan, R., Cho, D. H., Oh, H. M., & Kim, H. S. (2014). Role of Rhizobium, a  
661 plant growth promoting bacterium, in enhancing algal biomass through mutualistic  
662 interaction. *Biomass and Bioenergy*, 69, 95-105.
- 663 Kinnunen-Grubb, M., Sapkota, R., Vignola, M., Nunes, I. M., & Nicolaisen, M. (2020).  
664 Breeding selection imposed a differential selective pressure on the wheat root-associated  
665 microbiome. *FEMS Microbiology Ecology*, 96(11), fiae196.
- 666 Komsta, L., & Novomestky, F. (2015). Moments, cumulants, skewness, kurtosis and related  
667 tests. R package version, 14.
- 668 Kusmec, A., Srinivasan, S., Nettleton, D., & Schnable, P. S. (2017). Distinct genetic  
669 architectures for phenotype means and plasticities in *Zea mays*. *Nature Plants*, 3, 715–723.
- 670 Laitinen, R. A. E., & Nikoloski, Z. (2019). Genetic basis of plasticity in plants. *Journal of*  
671 *Experimental Botany*, 70(3), 739–745.
- 672 Lambers, H., Mougel, C., Jaillard, B., & Hinsinger, P. (2009). Plant-microbe-soil interactions  
673 in the rhizosphere: an evolutionary perspective. *Plant and soil*, 321(1-2), 83-115.
- 674 Leff, J. W., Lynch, R. C., Kane, N. C., & Fierer, N. (2017). Plant domestication and the  
675 assembly of bacterial and fungal communities associated with strains of the common  
676 sunflower. *New Phytologist*, 214(1), 412-423.
- 677 Lehmann, A., Barto, E. K., Powell, J. R., & Rillig, M. C. (2012). Mycorrhizal responsiveness  
678 trends in annual crop plants and their wild relatives-a meta-analysis on studies from 1981 to  
679 2010. *Plant and Soil*, 355(1–2), 231–250.
- 680 Leiser, W. L., Olatoye, M. O., Rattunde, H. F. W., Neumann, G., Weltzien, E., & Haussmann,  
681 B. I. (2016). No need to breed for enhanced colonization by arbuscular mycorrhizal fungi to  
682 improve low-P adaptation of West African sorghums. *Plant and soil*, 401(1-2), 51-64.

- 683 Lemanceau, P., Blouin, M., Muller, D., & Moënne-Loccoz, Y. (2017). Let the core microbiota  
684 be functional. *Trends in Plant Science*, 22(7), 583–595.
- 685 Lundberg, D. S., Lebeis, S. L., Paredes, S. H., Yourstone, S., Gehring, J., Malfatti, S., ... &  
686 Edgar, R. C. (2012). Defining the core *Arabidopsis thaliana* root microbiome. *Nature*,  
687 488(7409), 86-90.
- 688 Mei, C., & Flinn, B. S. (2010). The use of beneficial microbial endophytes for plant biomass  
689 and stress tolerance improvement. *Recent Patents on Biotechnology*, 4(1), 81-95.
- 690 Milla, R., Osborne, C. P., Turcotte, M. M., & Violle, C. (2015). Plant domestication through  
691 an ecological lens. *Trends in ecology & evolution*, 30(8), 463-469.
- 692 Mutch, L. A., & Young, J. P. W. (2004). Diversity and specificity of *Rhizobium*  
693 *leguminosarum biovar viciae* on wild and cultivated legumes. *Molecular Ecology*, 13(8),  
694 2435-2444.
- 695 Peiffer, J. A., Spor, A., Koren, O., Jin, Z., Tringe, S. G., Dangl, J. L., ... & Ley, R. E. (2013).  
696 Diversity and heritability of the maize rhizosphere microbiome under field conditions.  
697 *Proceedings of the National Academy of Sciences*, 110(16), 6548-6553.
- 698 Pérez-Jaramillo, J. E., Carrión, V. J., Bosse, M., Ferrão, L. F., de Hollander, M., Garcia, A.  
699 A., ... & Raaijmakers, J. M. (2017). Linking rhizosphere microbiome composition of wild and  
700 domesticated *Phaseolus vulgaris* to genotypic and root phenotypic traits. *The ISME journal*,  
701 11(10), 2244-2257.
- 702 Pérez-Jaramillo, J. E., Carrión, V. J., de Hollander, M., & Raaijmakers, J. M. (2018). The  
703 wild side of plant microbiomes. *Microbiome*, 6(1), 143.

- 704 Pérez-Jaramillo, J. E., Mendes, R., & Raaijmakers, J. M. (2016). Impact of plant  
705 domestication on rhizosphere microbiome assembly and functions. *Plant molecular biology*,  
706 90(6), 635-644.
- 707 Ramirez, K. S., Lauber, C. L., Knight, R., Bradford, M. A., & Fierer, N. (2010). Consistent  
708 effects of nitrogen fertilization on soil bacterial communities in contrasting systems. *Ecology*,  
709 91(12), 3463–3470. <https://doi.org/10.1890/10-0426.1>
- 710 Ramirez, K. S., Craine, J. M., & Fierer, N. (2012). Consistent effects of nitrogen amendments  
711 on soil microbial communities and processes across biomes. *Global change biology*, 18(6),  
712 1918-1927.
- 713 Rodriguez, R., & Redman, R. (2008). More than 400 million years of evolution and some  
714 plants still can't make it on their own: plant stress tolerance via fungal symbiosis. *Journal of*  
715 *experimental botany*, 59(5), 1109-1114.
- 716 RStudio Team (2020). RStudio: Integrated Development for R. RStudio, PBC, Boston, MA  
717 URL <http://www.rstudio.com/>.
- 718 Sangabriel-Conde, W., Maldonado-Mendoza, I. E., Mancera-López, M. E., Cordero-Ramírez,  
719 J. D., Trejo-Aguilar, D., & Negrete-Yankelevich, S. (2015). Glomeromycota associated with  
720 Mexican native maize landraces in Los Tuxtlas, Mexico. *Applied Soil Ecology*, 87, 63-71.
- 721 Schmalhausen, I. I. (1949). *Factors of Evolution: The Theory of Stabilizing Selection*.  
722 Blakiston, Philadelphia, PA
- 723 Schöler, A., Jacquiod, S., Vestergaard, G., Schulz, S., Schloter, M., 2017. Analysis of soil  
724 microbial communities based on amplicon sequencing of marker genes. *Biology and Fertility*  
725 *of Soils* 53, 485.

- 726 Shannon, P., Markiel, A., Ozier, O., Baliga, N. S., Wang, J. T., Ramage, D., ... & Ideker, T.  
727 (2003). Cytoscape: a software environment for integrated models of biomolecular interaction  
728 networks. *Genome research*, 13(11), 2498-2504.
- 729 Shi, S., Tian, L., Xu, S., Ji, L., Nasir, F., Li, X., ... & Tian, C. (2019). The rhizomicrobiomes  
730 of wild and cultivated crops react differently to fungicides. *Archives of microbiology*, 201(4),  
731 477-486.
- 732 Stearns, S. C. (1989). The Evolutionary Significance of Phenotypic Plasticity. *BioScience*,  
733 39(7), 436–445. <https://doi.org/10.2307/1311135>
- 734 Szoboszlay, M., Lambers, J., Chappell, J., Kupper, J. V., Moe, L. A., & McNear Jr, D. H.  
735 (2015). Comparison of root system architecture and rhizosphere microbial communities of  
736 Balsas teosinte and domesticated corn cultivars. *Soil Biology and Biochemistry*, 80, 34-44.
- 737 Trouvelot, A., Kough, J.L., and Gianinazzi-Pearson, V. (1986). “Mesure du taux de  
738 mycorhization VA d’un système racinaire. Recherche de methodes d’estimation ayant une  
739 signification fonctionnelle.” In *Physiological and Genetical Aspects of Mycorrhizae*.  
740 *Proceedings of the 1st European Symposium on Mycorrhizae*, eds V.Gianinazzi-Pearson and  
741 S.Gianinazzi (Paris: Institut National de la Recherche Agronomique), 217–221.
- 742 Turcotte, M. M., Lochab, A. K., Turley, N. E., & Johnson, M. T. (2015). Plant domestication  
743 slows pest evolution. *Ecology letters*, 18(9), 907-915.
- 744 Valente, J., Gerin, F., Le Gouis, J., Moënné-Loccoz, Y., & Prigent-Combaret, C. (2020).  
745 Ancient wheat varieties have a higher ability to interact with plant growth-promoting  
746 rhizobacteria. *Plant, Cell & Environment*, 43(1), 246-260.



747 Vierheilig, H., Coughlan, A.P., Wyss, U., Piché, Y., 1998. Ink and vinegar, a simple staining  
748 technique for arbuscular-mycorrhizal fungi. *Appl. Environ. Microbiol.* 64, 5004–5007.  
749 <https://doi.org/10.1128/aem.64.12.5004-5007.1998>

750 Wagner, M. R., Lundberg, D. S., Tijana, G., Tringe, S. G., Dangl, J. L., & Mitchell-Olds, T.  
751 (2016). Host genotype and age shape the leaf and root microbiomes of a wild perennial plant.  
752 *Nature communications*, 7(1), 1-15.

753 Weese, D. J., Heath, K. D., Dentinger, B. T., & Lau, J. A. (2015). Long-term nitrogen  
754 addition causes the evolution of less cooperative mutualists. *Evolution*, 69(3), 631-642.

755 Zhu, Y., Christie, P., & Laidlaw, A. S. (2001). Uptake of Zn by arbuscular mycorrhizal white  
756 clover from Zn-contaminated soil. *Chemosphere*, 42(2), 193-199.

757

758

## 759 **FIGURE LEGENDS**

760 **Figure 1:** Alpha-diversity of the rhizosphere bacterial community (16S rRNA gene amplicon  
761 sequencing), presented as reaction norms of ancient and modern wheat genotypes to the  
762 environment modification by inputs. Panel are respectively showing: the richness (A), the  
763 Chao-1 estimator (B), the ACE estimator (C), the Simpson reciprocal index (D), the Shannon  
764 index (E) and the Equitability of Pielou (F). Data is shown as the interaction between the  
765 breeding type and the presence/absence of inputs (w/o: without inputs; w: with inputs).  
766 Significance was inferred with an ANOVA under the Tukey's HSD post-hoc test for normally  
767 distributed data (Honest Significant Detection,  $p < 0.05$ ). Non-parametric data were analyzed  
768 with a Kruskal-Wallis test under False Discovery Rate post-hoc correction (FDR,  $p < 0.05$ ).

769 **Figure 2:** Beta-diversity analysis of the bacterial (A) and fungal (B) communities using  
770 partial distance-based redundancy analysis (db-RDA). Partial db-RDA were used to output  
771 the following constrained models: breeding type + Condition (block) (10,000 permutations).

772 **Figure 3:** Alpha-diversity of the rhizosphere fungal community (ITS2 gene amplicon  
773 sequencing), presented as reaction norms of ancient and modern wheat genotypes to the  
774 environment modification by inputs. Panel are respectively showing: the richness (A), the  
775 Chao-1 estimator (B), the ACE estimator (C), the Simpson reciprocal index (D), the Shannon  
776 index (E) and the Equitability of Pielou (F). Data is shown as the interaction between the  
777 breeding type and the presence/absence of inputs (w/o: without inputs; w: with inputs).  
778 Significance was inferred with an ANOVA under the Tukey's HSD post-hoc test for normally  
779 distributed data (Honest Significant Detection,  $p < 0.05$ ). Non-parametric data were analyzed  
780 with a Kruskal-Wallis test under False Discovery Rate post-hoc correction (FDR,  $p < 0.05$ ).

781 **Figure 4:** Network analysis of the rhizosphere microbiota associated to the modern and  
782 ancient wheat varieties. The networks were constructed using dominant OTUs (sum min =

783 100 counts, occurrence = 25/51 for bacteria, and 25/50 for fungi) and based on partial  
784 correlations obtained with Poisson Log Normal models combining the bacterial and fungal  
785 datasets together (~1 + block + offset). For visualization, both networks were merged into  
786 one, and shown twice with edges that are unique of modern varieties highlighted on the left  
787 network (pink), and edges that are unique of the ancient varieties highlighted on the right  
788 network (khaki). Common link are highlighted in both networks in deep blue. Hidden links  
789 are corresponding to modern/ancient edges respectively not shown in each network. Barcharts  
790 represent average network complexity indices estimated from edges or nodes (Kruskal-Wallis  
791 test,  $p < 0.05$ ).

792 **Figure 5:** Mycorrhizal colonization for breeding types and inputs. Panel are respectively  
793 showing: the intensity of mycorrhizal colonization in root system (A), the intensity of  
794 mycorrhizal colonization in root fragment (B), the arbuscular abundance in root system (C),  
795 the arbuscular abundance in root fragment (D) in response to the breeding types (whatever the  
796 presence of inputs) and the intensity of mycorrhizal colonization in root system (E) and the  
797 intensity of mycorrhizal colonization in root fragment (F) in response to inputs (whatever the  
798 breeding type). Significance was inferred with an ANOVA under the Tukey's HSD post-hoc  
799 test for normally distributed data (Honest Significant Detection,  $p < 0.05$ ). Non-parametric  
800 data were analyzed with a Kruskal-Wallis test under False Discovery Rate post-hoc correction  
801 (FDR,  $p < 0.05$ ).

## 802 TABLES LEGENDS

803 **Table 1:** Analysis of variance and Kruskal-Wallis tests for bacterial alpha diversity indices. F  
804 and chi-square ( $\chi^2$ ) values are given, with asterisks indicating the significance of effects.  
805 "Block" is the factor identifying the three repeated blocks in the experimental design.  
806 "Inputs:Breeding type:Variety" is an error term for the variance explained by the variety  
807 inside each breeding type. For non-parametric data, Kruskal-Wallis tests were done

808 individually on each factor or factor combinations. The directions of significant effects are  
809 indicated. w, presence of inputs; w/o, absence of inputs; Mod., modern varieties; Anc.,  
810 ancient varieties;  $\cdot$ ,  $p < 0.10$ ; \*,  $p < 0.05$ ; \*\*,  $p < 0.01$ ; \*\*\*,  $p < 0.001$ .

811 **Table 2:** Permutational analysis of variance for bacterial and fungal alpha diversity based on  
812 the six diversity indices (Richness, Chao-1, ACE, Simpson reciprocal, Shannon and  
813 Equitability) and for parameters describing mycorrhizal colonization (F, M, m, A and a, see  
814 Materials and Methods for a description). F values are given, with asterisks indicating the  
815 significance of effects.  $\cdot$ ,  $p < 0.10$ ; \*,  $p < 0.05$ ; \*\*,  $p < 0.01$ ; \*\*\*,  $p < 0.001$ .

816 **Table 3:** Permutational analysis of variance for bacterial (16S) and fungal (ITS) beta  
817 diversity. F values are given, with asterisks indicating the significance of effects. The  
818 directions of effects are indicated. Mod., modern varieties; Anc., ancient varieties;  $\cdot$ ,  $p < 0.10$ ;  
819 \*,  $p < 0.05$ ; \*\*,  $p < 0.01$ ; \*\*\*,  $p < 0.001$ .

820 **Table 4:** Analysis of variance and Kruskal-Wallis tests for fungal alpha diversity indices. F  
821 and chi-square ( $\chi^2$ ) values are given, with asterisks indicating the significance of effects.  
822 “Block” is the factor identifying the three repeated blocks in the experimental design.  
823 “Inputs:Breeding type:Variety” is an error term for the variance explained by the variety  
824 inside each breeding type. For non-parametric data, Kruskal-Wallis tests were done  
825 individually on each factor or factor combinations. The directions of significant effects are  
826 indicated. w, presence of inputs; w/o, absence of inputs; Mod., modern varieties; Anc.,  
827 ancient varieties;  $\cdot$ ,  $p < 0.10$ ; \*,  $p < 0.05$ ; \*\*,  $p < 0.01$ ; \*\*\*,  $p < 0.001$ .

828 **Table 5:** Analysis of variance and Kruskal-Wallis tests for mycorrhiza indices. F and chi-  
829 square ( $\chi^2$ ) values are given, with asterisks indicating the significance of effects. “Block” is  
830 the factor identifying the three repeated blocks in the experimental design. “Series” refers to  
831 the two different batches of staining of mycorrhiza. “Inputs:Breeding type:Variety” is an error

832 term for the variance explained by the variety inside each breeding type. For non-parametric  
833 data, Kruskal-Wallis tests were done individually on each factor or factor combinations. The  
834 directions of significant effects are indicated. w, presence of inputs; w/o, absence of inputs;  
835 M, modern varieties; A, ancient varieties;  $\cdot$ ,  $p < 0.10$ ; \*,  $p < 0.05$ ; \*\*,  $p < 0.01$ ; \*\*\*,  $p <$   
836 0.001.

837

838 **FIGURES**

839 **Figure 1: Bacterial alpha-diversity analysis**

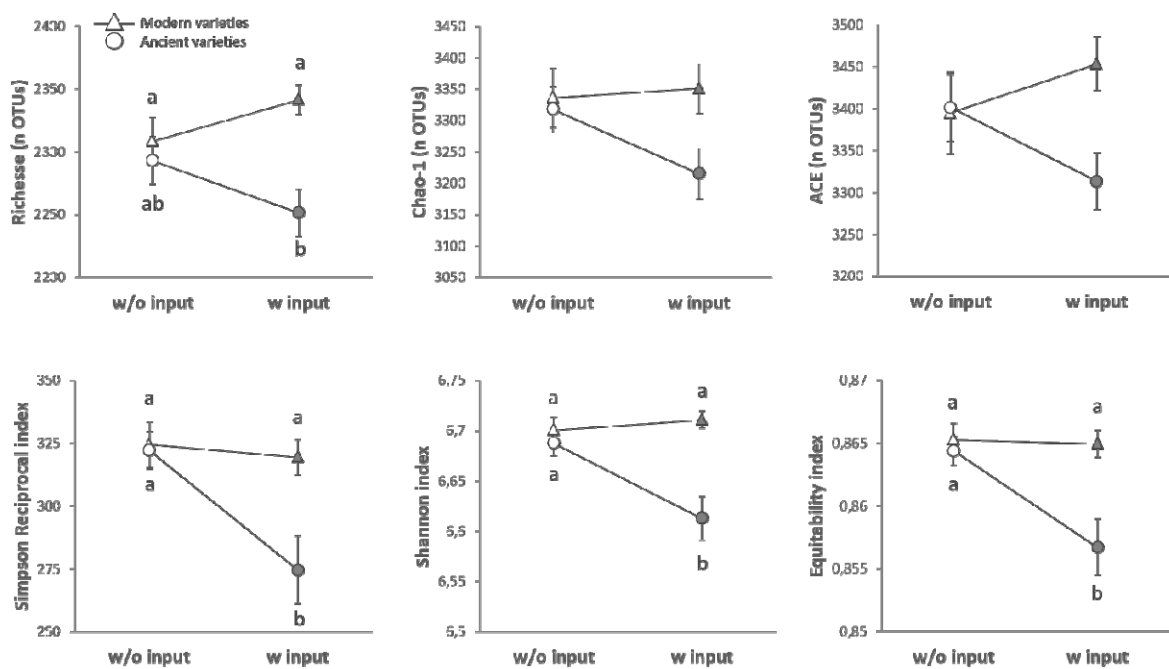

840

841

842

843 **Figure 2: Rhizosphere microbiota beta-diversity analysis**

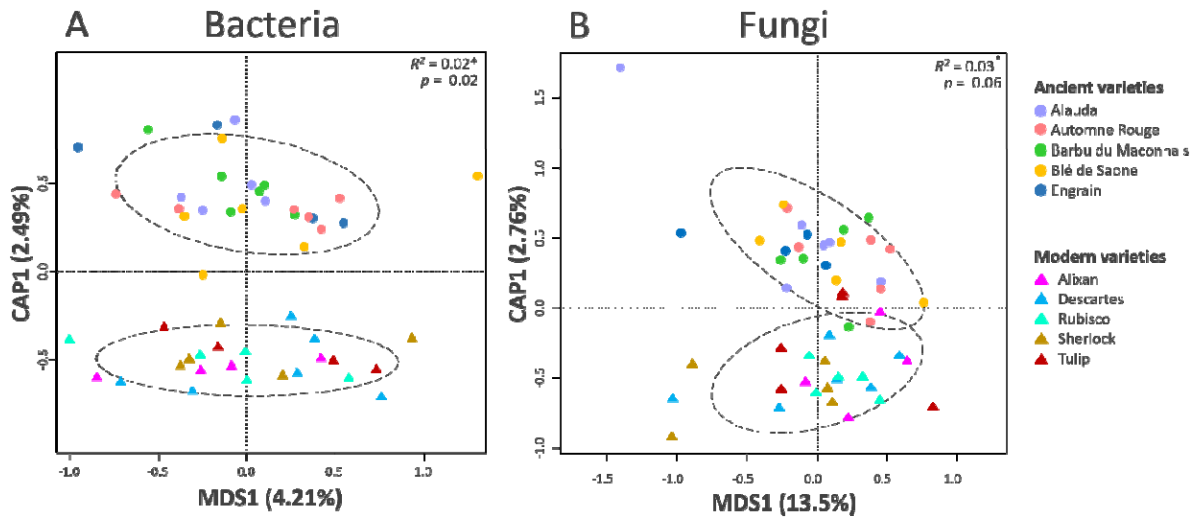

844

845

846 **Figure 3:** Fungal alpha-diversity analysis

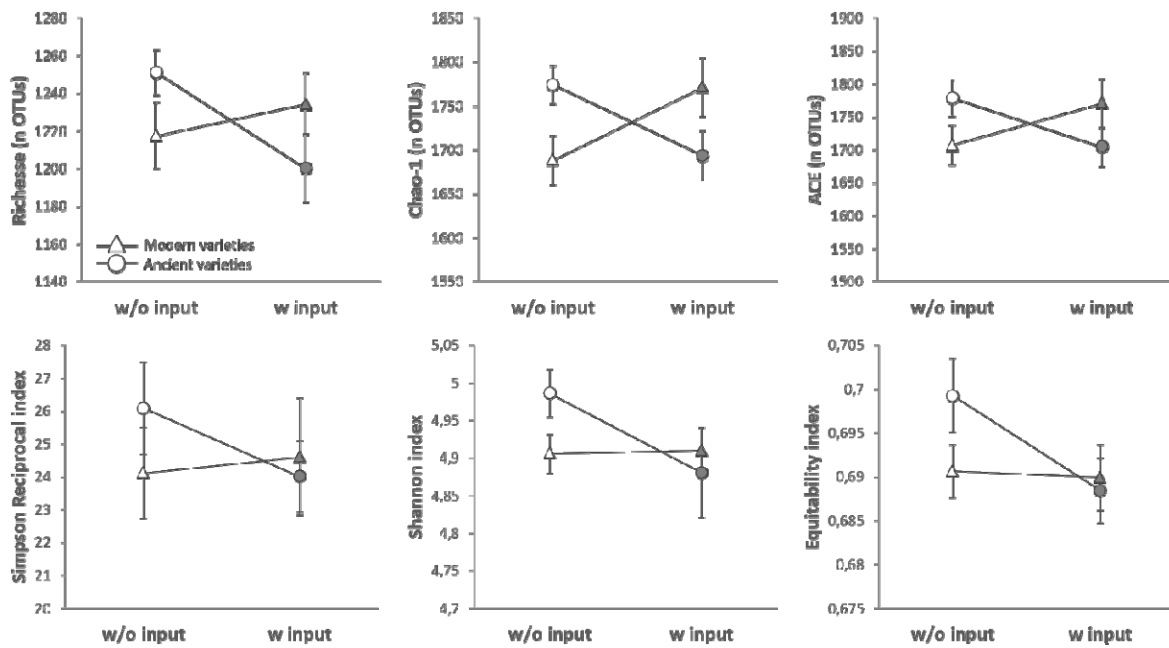

847

848



849 **Figure 4:** Rhizosphere microbiota network analysis

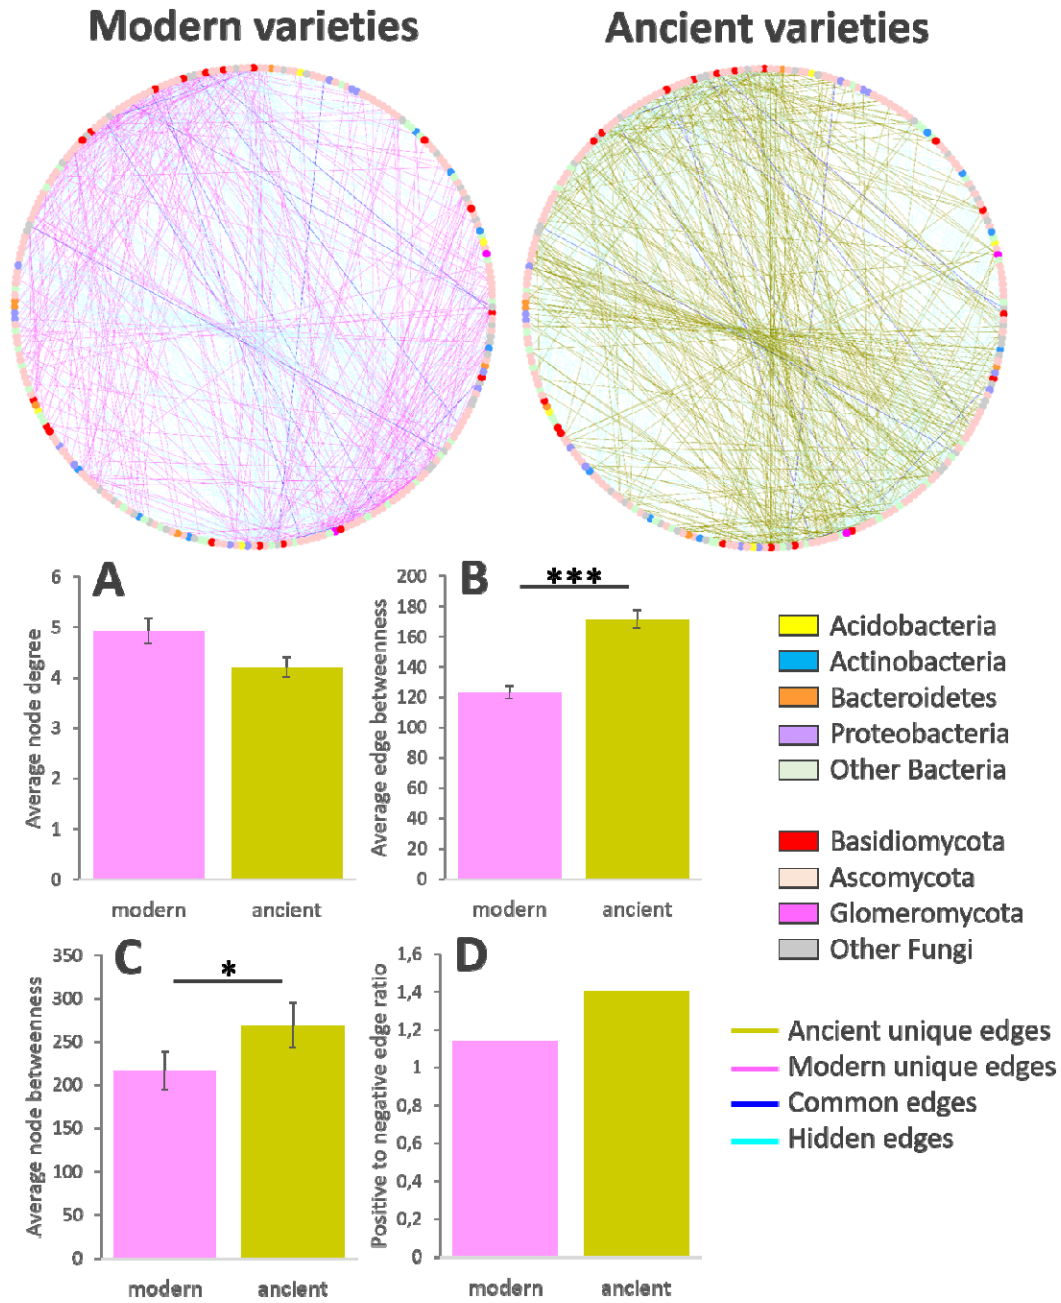

850

851

852 **Figure 5: Mycorrhiza analysis**

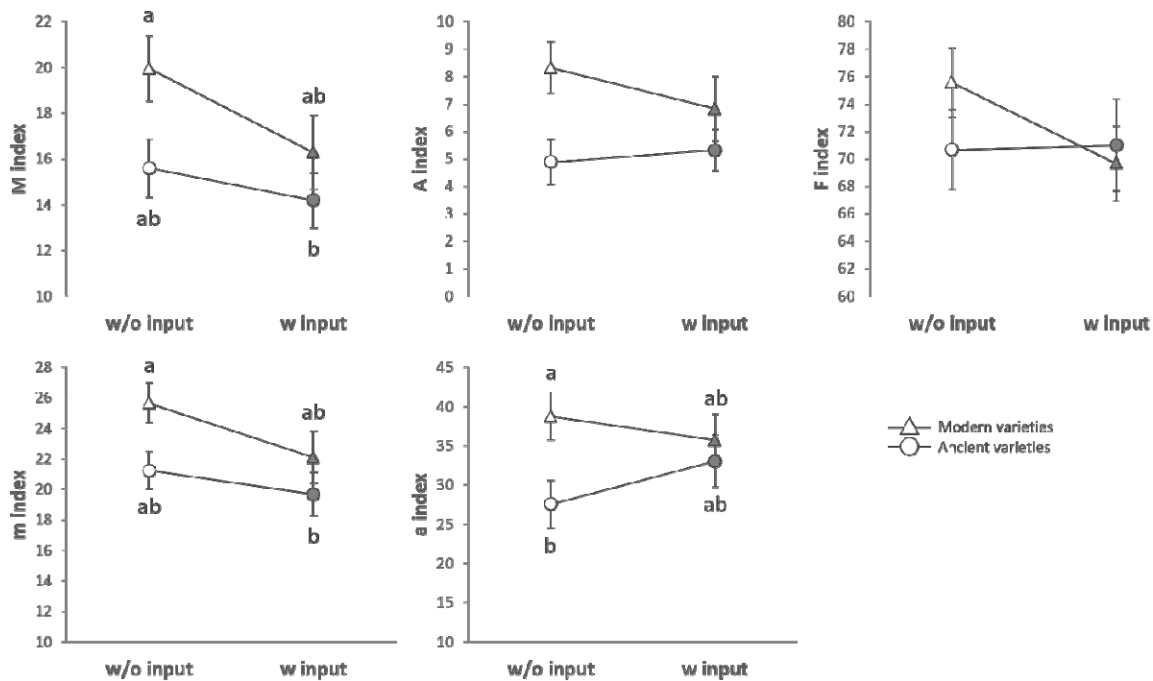

853

854

855 TABLES

856 **Table 1:** Bacterial alpha-diversity univariate analysis

| Factors                             | Richness (F) | Chao-1 (F)                     | ACE (F) | Simpson reciprocal ( $\chi^2$ )           | Shannon ( $\chi^2$ )           | Equitability ( $\chi^2$ ) |
|-------------------------------------|--------------|--------------------------------|---------|-------------------------------------------|--------------------------------|---------------------------|
| Inputs                              | 0.063        | 1.688                          | 0.207   | 3.914*                                    | 1.278                          | 3.622 .                   |
| Breeding type                       | 14.81***     | 5.586*                         | 4.436*  | 4.077*                                    | 9.578**                        | 6.300*                    |
| Block                               | 0.043        | 0.444                          | 0.437   | 5.233 .                                   | 2.611                          | 4.972 .                   |
| Inputs x Breeding type              | 7.363*       | 3.412 .                        | 5.151*  | 10.83*                                    | 15.64**                        | 12.50**                   |
| Inputs x Breeding type/Variety      | 2.740**      | 2.528*                         | 2.247*  | 10.10                                     | 14.31                          | 11.64                     |
| Direction of effects                | Mod. > Anc.  | Mod. > Anc.<br>w/o > w in Anc. |         | w/o > w<br>Mod. > Anc.<br>w/o > w in Anc. | Mod. > Anc.<br>w/o > w in Anc. | w/o > w in Anc.           |
| R <sup>2</sup> (variance explained) | 0.695        | 0.642                          | 0.616   | na                                        | na                             | na                        |

857

858 **Table 2:** Alpha-diversity and mycorrhiza multivariate analysis

859

| <b>PERMANOVA</b>                    | <b>R<sup>2</sup> (Bacteria)</b> | <b>R<sup>2</sup> (Fungi)</b> | <b>R<sup>2</sup> (Myco)</b> |
|-------------------------------------|---------------------------------|------------------------------|-----------------------------|
| Input                               | 0.014                           | 0.004                        | 0.008                       |
| Breeding                            | 0.074*                          | 1.7E-05                      | 0.028**                     |
| Input x Breeding                    | 0.057*                          | 0.105*                       | 0.011                       |
| Input x Breeding/variety            | 0.478*                          | 0.118                        | 0.188**                     |
| Block                               | 0.012                           | 0.046                        | 0.028*                      |
| Residual                            | 0.365                           | 0.727                        | 0.737                       |
| R <sup>2</sup> (variance explained) | 0.635                           | 0.273                        | 0.263                       |

860

861 **Table 3:** Rhizosphere microbiota beta-diversity analysis

| <b>Factors</b>                 | <b>Bacteria (16S rRNA gene)</b> | <b>Fungi (ITS2 fragment)</b> |
|--------------------------------|---------------------------------|------------------------------|
| Inputs                         | 0.018                           | 0.022                        |
| Breeding type                  | 0.027*                          | 0.025*                       |
| Block                          | 0.065***                        | 0.054*                       |
| Inputs x Breeding type         | 0.019                           | 0.017                        |
| Inputs x Breeding type/Variety | 0.308                           | 0.347*                       |
| Residual                       | 0.564                           | 0.535                        |

862

863 **Table 4:** Fungal alpha-diversity univariate analysis

| Factors                             | Richness (F) | Chao-1 (F)                         | ACE (F)                            | Simpson reciprocal ( $\chi^2$ ) | Shannon (F)                   | Equitability (F) |
|-------------------------------------|--------------|------------------------------------|------------------------------------|---------------------------------|-------------------------------|------------------|
| Inputs                              | 1.002        | 0.005                              | 0.048                              | 0.746                           | 4.457*                        | 3.601 .          |
| Breeding type                       | 0.001        | 0.012                              | 0.004                              | 1.141                           | 0.899                         | 1.124            |
| Block                               | 0.924        | 1.148                              | 0.677                              | 4.557 .                         | 6.571**                       | 5.987**          |
| Inputs x Breeding type              | 2.845        | 5.624*                             | 3.097 .                            | 2.590                           | 3.035 .                       | 1.413            |
| Inputs x Breeding type/Variety      | 0.298        | 0.282                              | 0.282                              | 10.40                           | 1.049                         | 1.277            |
| Direction of effects                |              | w/o < w in Mod.<br>w/o > w in Anc. | w/o < w in Mod.<br>w/o > w in Anc. |                                 | w/o > w<br>Mod. < Anc. in w/o | w/o>w            |
| R <sup>2</sup> (explained variance) | 0.272        | 0.308                              | 0.243                              | na                              | 0.578                         | 0.579            |

864

865 **Table 5:** Mycorrhiza univariate analysis

| <b>Factors</b>                      | <b>M (F)</b>           | <b>m (F)</b>           | <b>a (F)</b> | <b>A (<math>\chi^2</math>)</b> | <b>F (<math>\chi^2</math>)</b> |
|-------------------------------------|------------------------|------------------------|--------------|--------------------------------|--------------------------------|
| Inputs                              | 5.03*                  | 4.06*                  | 0.18         | 0.628                          | 0.872                          |
| Breeding type                       | 8.08**                 | 7.12**                 | 5.75*        | 5.591*                         | 0.122                          |
| Series                              | 25.93***               | 6.97**                 | 13.62***     | 16.14***                       | 31.70***                       |
| Block                               | 3.91*                  | 3.03*                  | 0.97         | 2.771                          | 4.487                          |
| Inputs x Breeding type              | 0.99                   | 0.62                   | 2.19         | 8.824*                         | 2.838                          |
| Inputs x Breeding type/Variety      | 2.80***                | 2.21**                 | 1.86*        | 10.70                          | 3.211                          |
| Direction of effects                | Mod. > Anc.<br>w/o > w | Mod. > Anc.<br>w/o > w | Mod. > Anc.  | Mod. > Anc.                    |                                |
| R <sup>2</sup> (explained variance) | 0.489                  | 0.383                  | 0.355        | na                             | na                             |

866
